# Supplementary material for: Assembly of complex plant–fungus networks
Source: PubMed Central journal article supplement — Nat Commun. 2014 Oct 20;5:5273. doi: 10.1038/ncomms6273 (PMC4218951; doi:10.1038/ncomms6273), 2014-10-20
Supplement: ncomms6273-s1.pdf [file ncomms6273-s1.pdf]

a

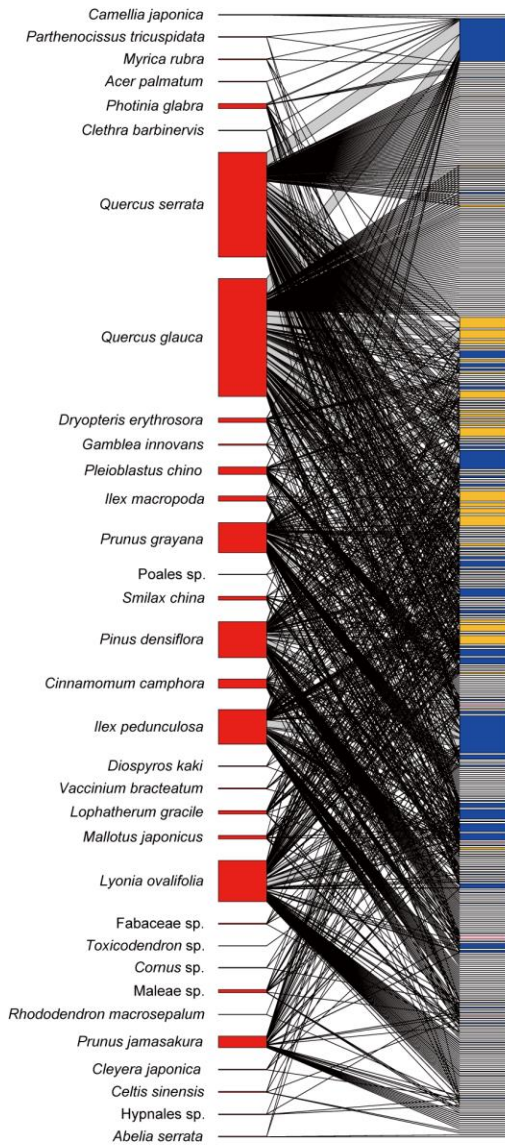

b

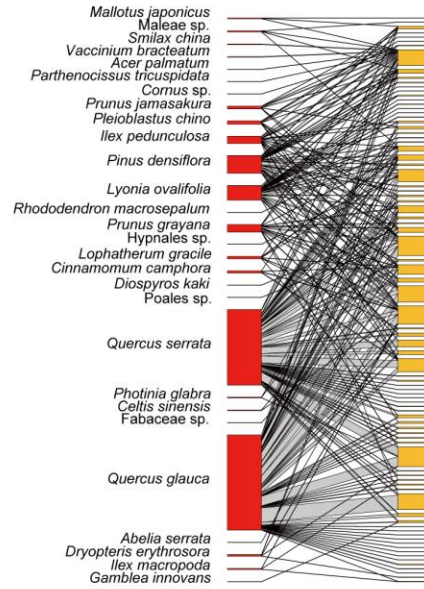

c

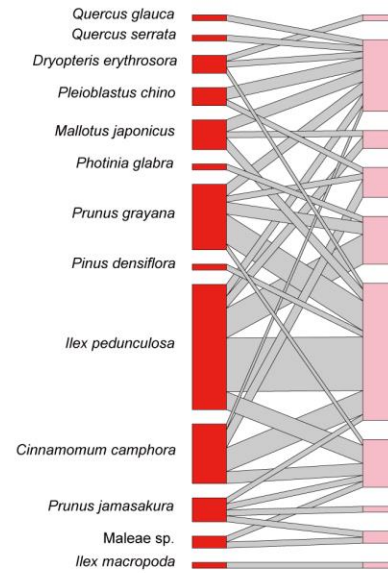

d

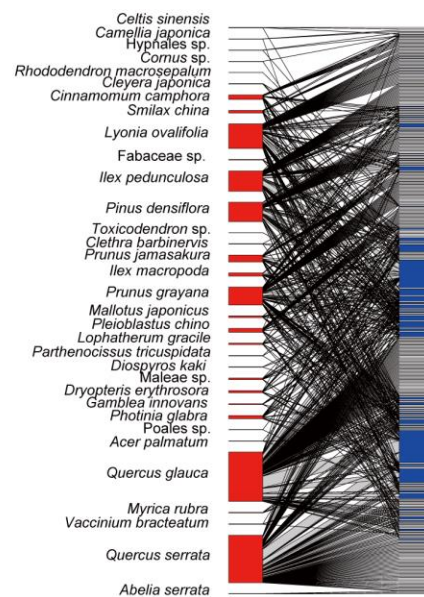

**Supplementary Figure 1 | Bipartite display of the plant–fungus network.** **a**, The entire network including all the 33 plant species (left side) and 387 fungal OTUs (right side). The thickness of lines and the size of rectangles represent the number of observed associations in the data matrix. Red, plant species; yellow, ectomycorrhizal fungal OTUs; pink, arbuscular mycorrhizal fungal OTUs; blue, fungal OTUs with unknown ecological functions. **b**, Partial network of ectomycorrhizal fungi and their host plants. **c**, Partial network of arbuscular mycorrhizal fungi and their host plants. **d**, Partial network of fungi with unknown functions and their host plants.

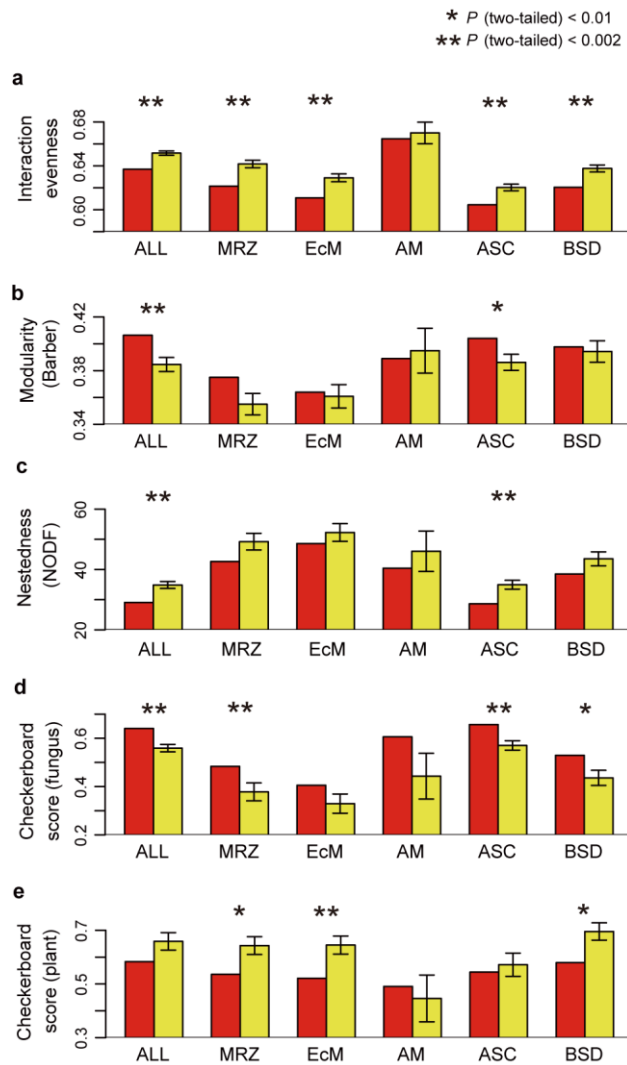

**Supplementary Figure 2 | Supplementary analysis of network architecture.** **a**, Interaction evenness evaluated by Shannon’s evenness for network entries. The observed interaction evenness (left bar, red) is shown for each network or partial network. Asterisks indicate significant deviation of observed interaction evenness from that of randomized networks [right bar, yellow (mean  $\pm$  SD)]. ALL, the entire network involving all plant species and fungal OTUs; MRZ, mycorrhizal partial network; EcM, ectomycorrhizal partial network; AM, arbuscular mycorrhizal partial network; ASC, ascomycete partial network; BSD, basidiomycete partial network. **b**, Modularity based on the Barber’s metric for bipartite datasets. **c**, NODF nestedness for datasets in a binary (i.e., presence/absence) format. **d**, Checkerboard score as a measure of host plant differentiation within the fungal community. For the entire network, the composition of host plant species was more differentiated between

fungus taxa than expected by chance. **e**, Checkerboard score as a measure of fungal symbiont differentiation within the plant community. The sign of partner differentiation was not observed within the plant community (see “ALL”), suggesting that competition for fungal symbionts was moderate or absent among plant species in the community.

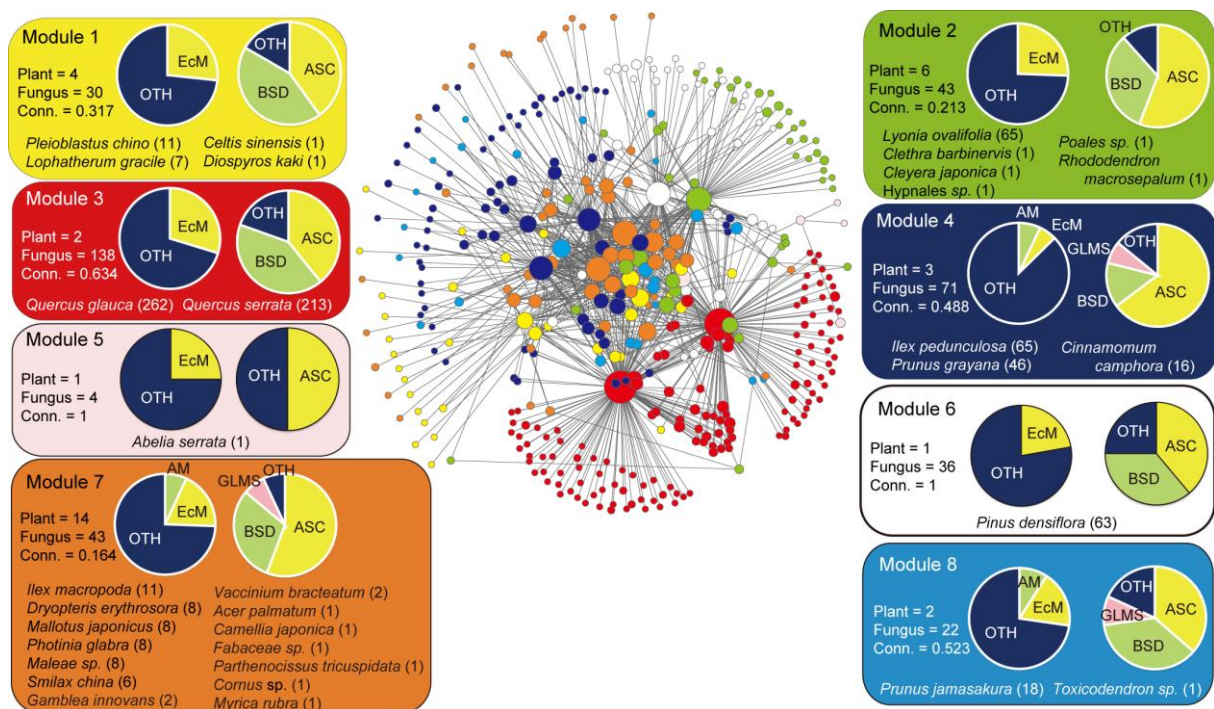

**Supplementary Figure 3 | Statistical modules of the plant–fungus network.** Based on the modularity analysis of the entire network (Fig. 3b), the members in different modules are indicated by colors. For each module, involved plant species are shown with the number of the root samples by which they were represented (i.e., the measure of relative abundance in the community). The pie charts in each module indicate the functional (left) and phylogenetic (right) composition of involved fungal OTUs. The numbers of plant species and fungal taxa, and connectance are shown for each module. AM, arbuscular mycorrhizal fungi; EcM, ectomycorrhizal fungi; ASC, ascomycete fungi; BSD, basidiomycete fungi; GLMS, glomeromycete fungi; OTH, others.

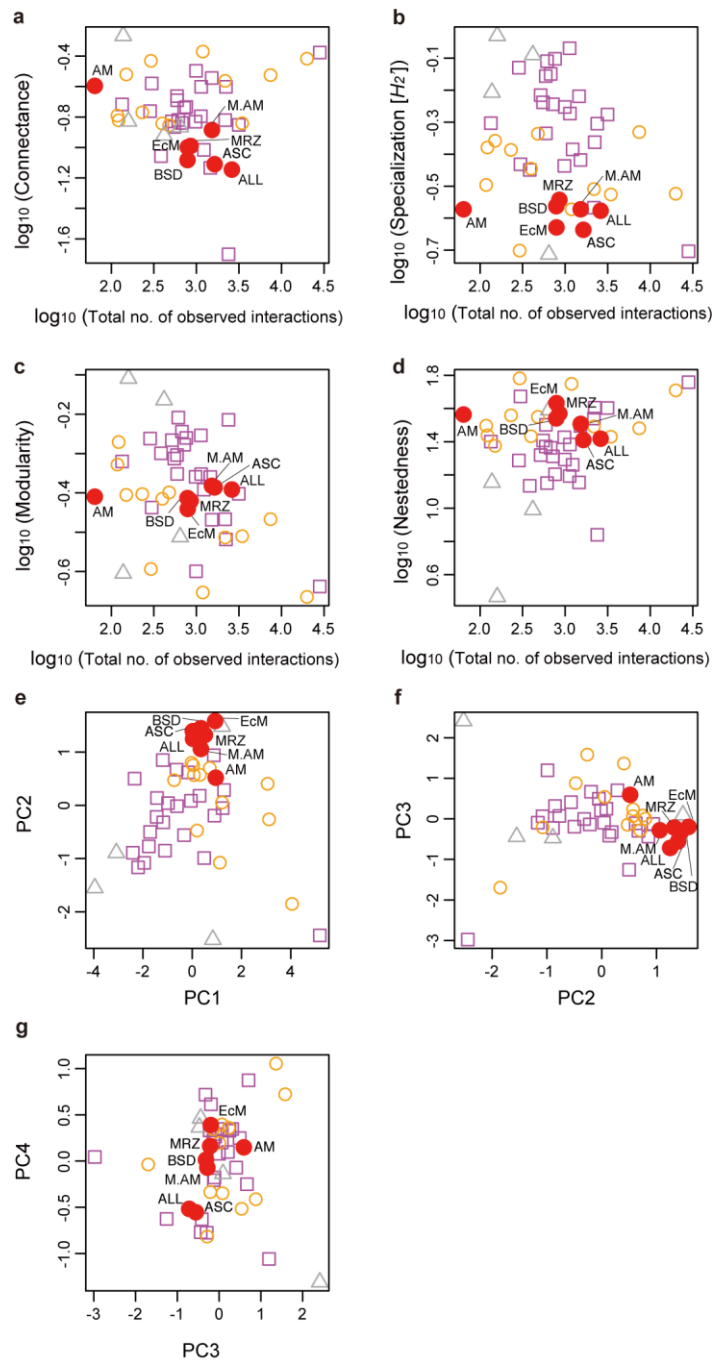

**Supplementary Figure 4 | Total number of observed interactions and comparative analysis of network architecture.** Across the 47 datasets with interaction frequency information (Supplementary Table 2), the dependence of network index values on the total number of observed interactions (i.e., the sum of interaction frequency) was examined. **a**, Network connectance. The symbols represent plant–pollinator (square), plant–seed disperser (open circle), myrmecophyte plant–ant (triangle), and plant–fungus (filled circle) networks. ALL, the entire network involving all plant species and fungal OTUs; MRZ, mycorrhizal

partial network; EcM, ectomycorrhizal partial network; AM, arbuscular mycorrhizal partial network; ASC, ascomycete partial network; BSD, basidiomycete partial network; M.AM an arbuscular mycorrhizal network in Mexico. **b**,  $H_2'$  network-level specialization. **c**, Network modularity. **d**, Nestedness (weighted NODF). **e–g**, Principal component analysis. Larger values in the principal component (PC) axis 1 represent highly nested [factor loading ( $r$ ) for modularity = 0.52] networks, while small values represent highly compartmentalized ( $r = -0.53$ ) ones (Supplementary Table 4). High values in the PC axis 2 indicate low connectance ( $r = -0.65$ ) and low specialization ( $r = -0.59$ ). The PC axis 3 is negatively correlated with the total number of observed interactions ( $r = -0.82$ ) and large values at the PC axis 4 represent high nestedness ( $r = 0.82$ ).

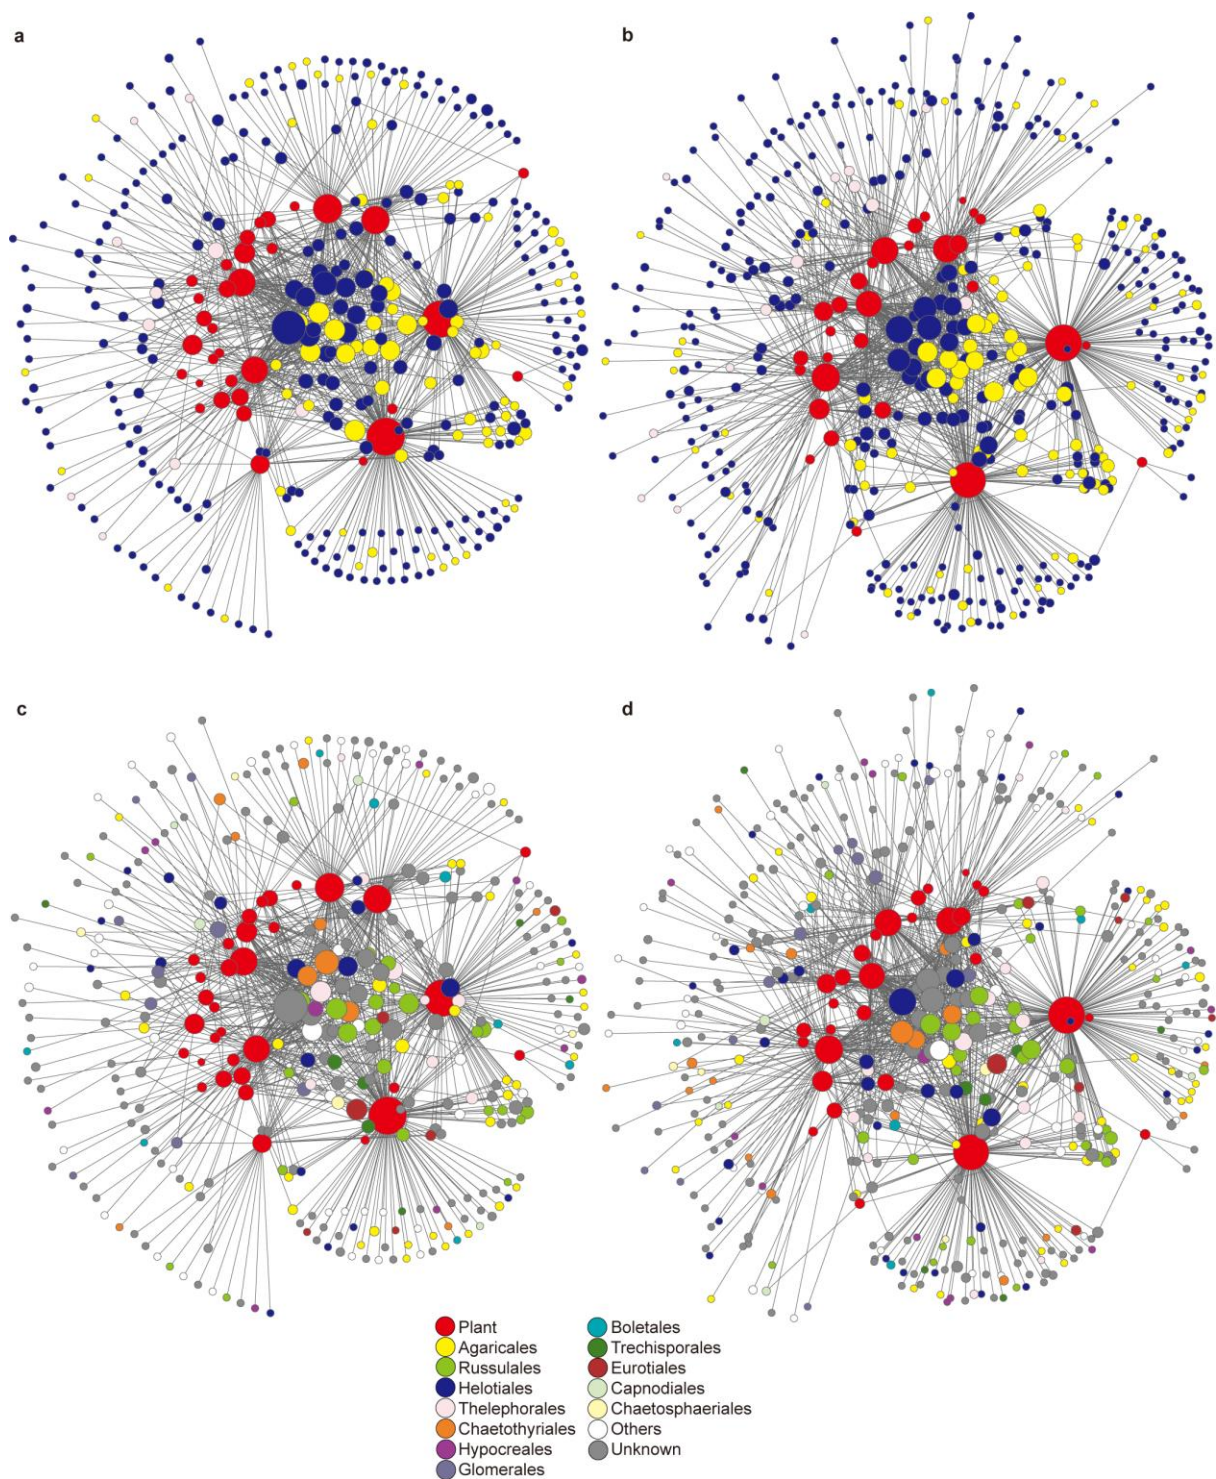

**Supplementary Figure 5 | Network topology at the cutoff fungal sequence similarities of 93% and 97%.** The network data (Fig. 1) were re-analyzed with cutoff fungal ITS sequence similarities of 93% (**a, c**) and 97% (**b, d**), respectively (Supplementary Data 1). **a**, Distribution of fungal functional groups within the network (93%). In the bipartite network,



plant species (red) interact with ectomycorrhizal (yellow) and arbuscular mycorrhizal (pink) fungal OTUs as well as OTUs with unknown ecological functions (blue). **b**, Distribution of fungal functional groups within the network (97%). **c**, Distribution of fungal taxonomic groups within the network (93%). Color represents the order-level taxonomy of fungal OTUs. **d**, Distribution of fungal taxonomic groups within the network (97%).

\*  $P$  (two-tailed) < 0.01  
 \*\*  $P$  (two-tailed) < 0.002

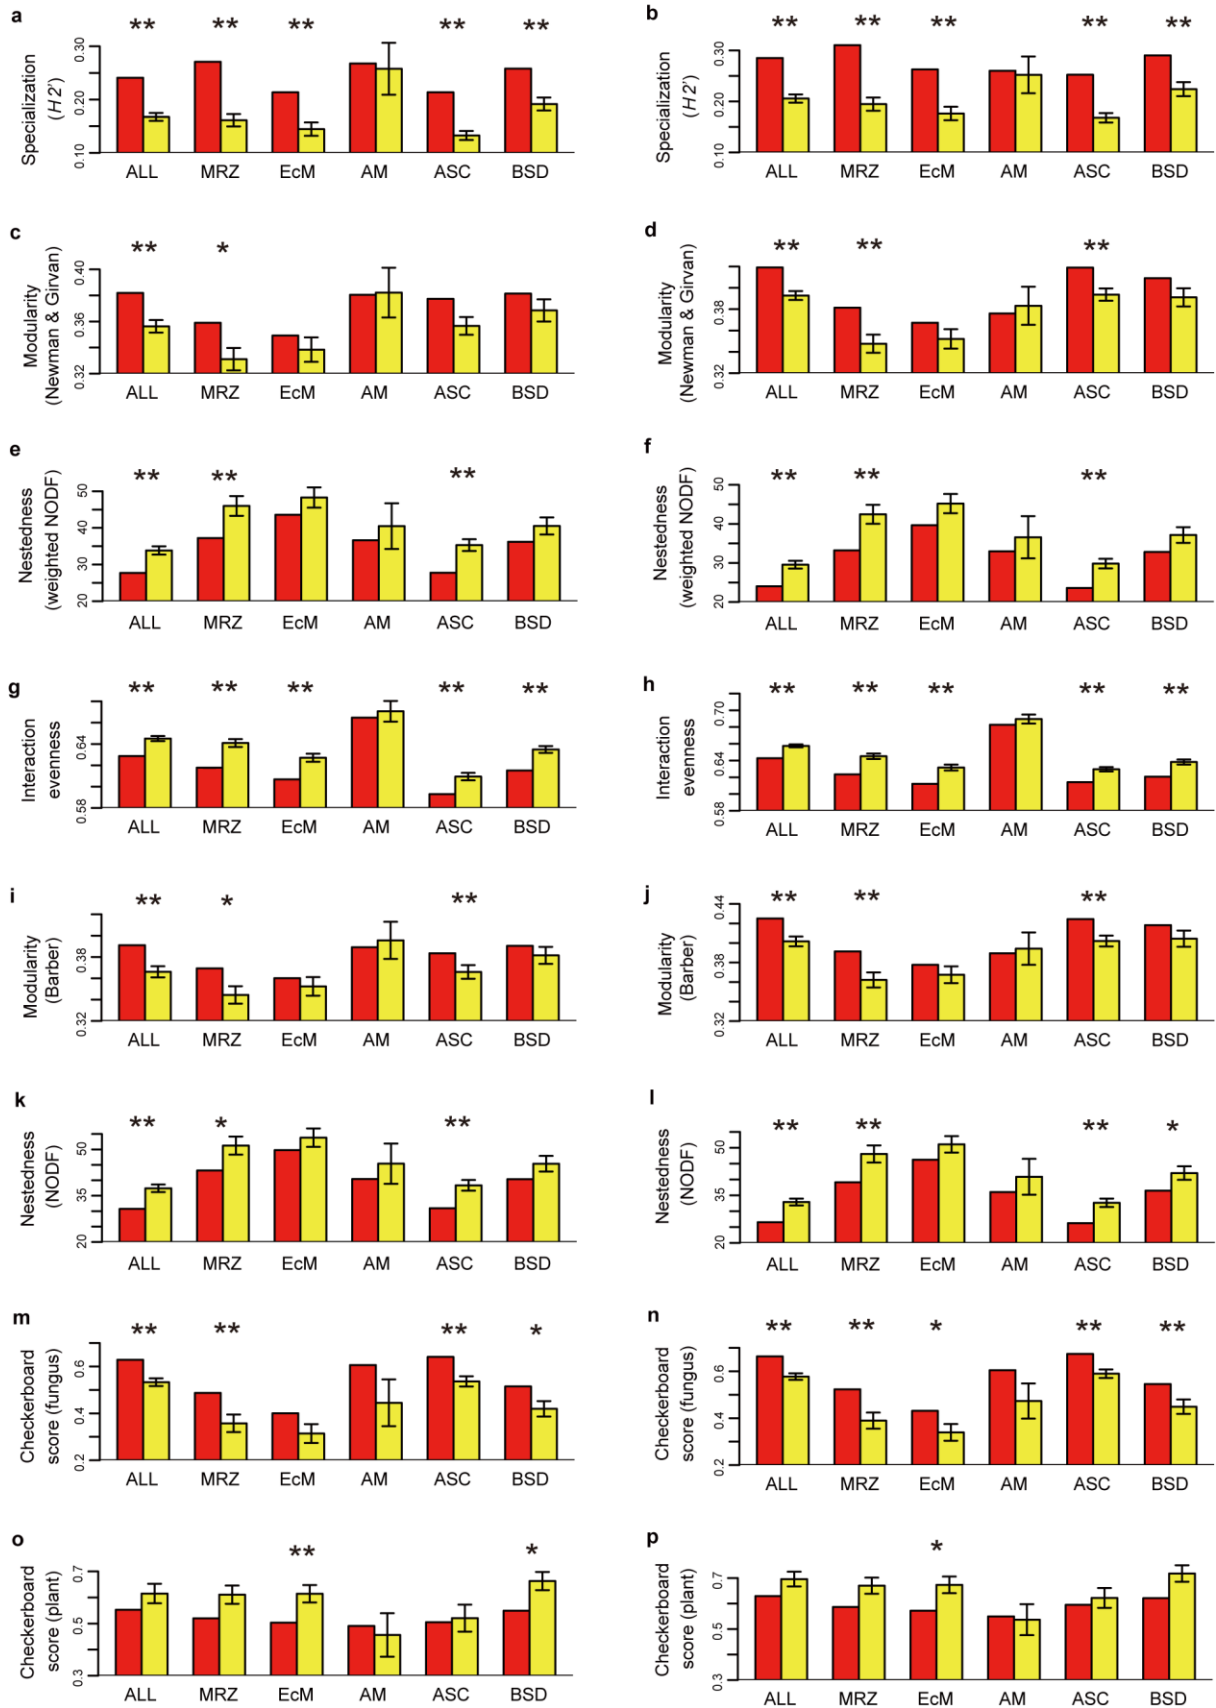

**Supplementary Figure 6 | Detailed analysis of network indices at the cutoff fungal**

**sequence similarities of 93% and 97%.** For each network matrix based on a cutoff fungal sequence similarity of 93% (left-side panels) or 97% (right-side panels), randomization tests of network indices were conducted. **a-b**,  $H_2'$  metric of network-level specialization. The observed  $H_2'$  metric of interaction specialization (left bar) is shown for each network or partial network. Asterisks indicate significant deviation of observed  $H_2'$  values from those of randomized networks [right bar (mean  $\pm$  SD)]. ALL, the entire network involving all plant species and fungal OTUs; MRZ, mycorrhizal partial network; EcM, ectomycorrhizal partial network; AM, arbuscular mycorrhizal partial network; ASC, ascomycete partial network; BSD, basidiomycete partial network. **c-d**, Newman and Girvan's metric of network modularity. **e-f**, Weighted NODF nestedness for network matrices with interaction frequency information. **g-h**, Interaction evenness evaluated by Shannon's evenness for network entries. **i-j**, Barber's metric of network modularity. **k-l**, NODF nestedness for datasets in a binary (i.e., presence/absence) format. **m-n**, Checkerboard score as a measure of host plant differentiation within the fungal community. **o-p**, Checkerboard score as a measure of fungal symbiont differentiation within the plant community.

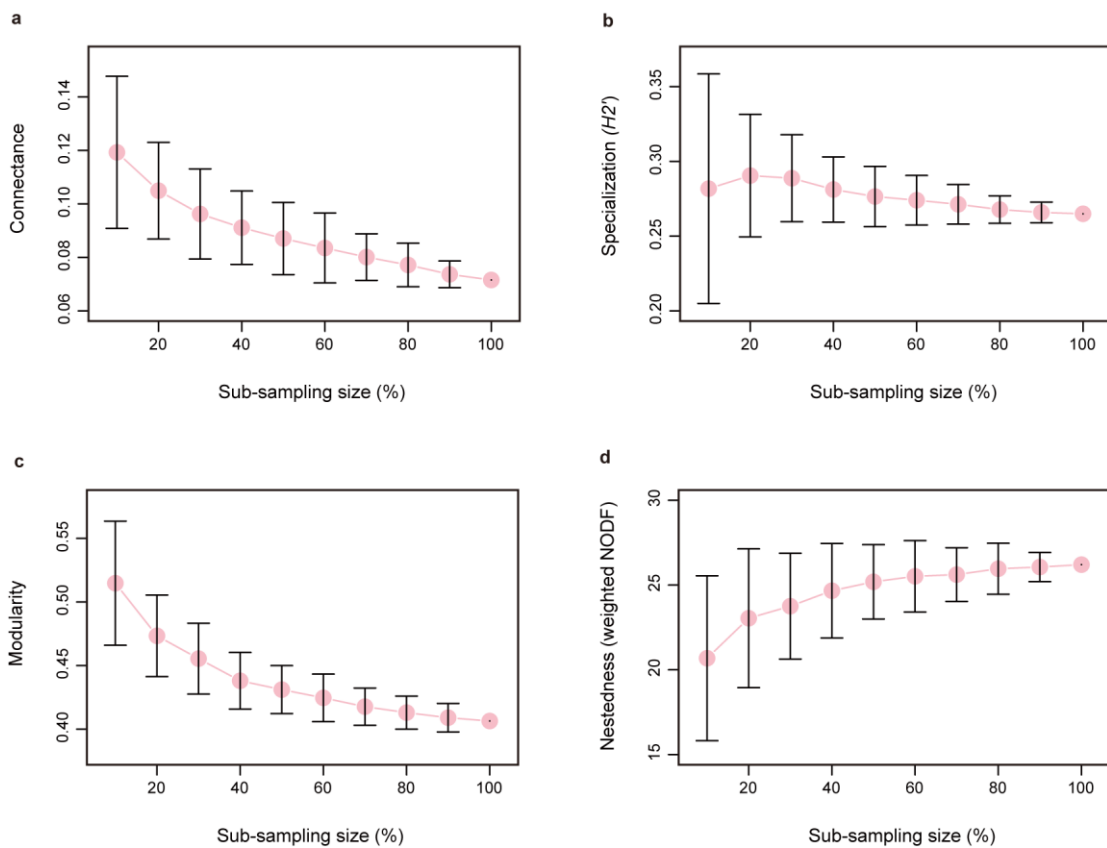

**Supplementary Figure 7 | Rarefaction analysis showing the potential influence of reduced sampling effort on network index estimates.** At each level of reduced sampling effort (from 10% to 90%), 100 rarefaction trials were conducted. The mean of estimated network index values was shown with 95% confidence intervals based on the Student's  $t$ -distribution ( $df = 99$ ). Estimates at the 100% rarefaction level represent those of the observed plant–fungus network (Fig. 3). **a**, Network connectance. **b**,  $H_2'$  network-level specialization. **c**, Network modularity. **d**, Nestedness (weighted NODF). See Supplementary Table 5 for the results of randomization tests of the examined network indices at each rarefaction level.

| Index                        | Data | Estimate | P value |         |         |
|------------------------------|------|----------|---------|---------|---------|
|                              |      |          | Model 1 | Model 2 | Model 3 |
| Specialization ( $H_2'$ )    | ALL  | 0.265    | < 0.001 | < 0.001 | < 0.001 |
|                              | MRZ  | 0.287    | < 0.001 | < 0.001 | < 0.001 |
|                              | EcM  | 0.235    | < 0.001 | < 0.001 | < 0.001 |
|                              | AM   | 0.268    | 0.396   | 0.040   | 0.009   |
|                              | ASC  | 0.231    | < 0.001 | < 0.001 | < 0.001 |
|                              | BSD  | 0.274    | < 0.001 | < 0.001 | < 0.001 |
| Modularity (Newman & Girvan) | ALL  | 0.397    | < 0.001 | < 0.001 | < 0.001 |
|                              | MRZ  | 0.366    | 0.006   | < 0.001 | < 0.001 |
|                              | EcM  | 0.353    | 0.233   | < 0.001 | < 0.001 |
|                              | AM   | 0.380    | 0.502   | 0.056   | 0.075   |
|                              | ASC  | 0.397    | 0.002   | < 0.001 | < 0.001 |
|                              | BSD  | 0.387    | 0.267   | < 0.001 | < 0.001 |
| Nestedness (weighted NODF)   | ALL  | 26.2     | 1.000   | 1.000   | 1.000   |
|                              | MRZ  | 37.1     | 0.998   | 1.000   | 1.000   |
|                              | EcM  | 42.9     | 0.924   | 1.000   | 0.996   |
|                              | AM   | 36.6     | 0.764   | 0.971   | 0.985   |
|                              | ASC  | 25.7     | 1.000   | 1.000   | 1.000   |
|                              | BSD  | 34.7     | 0.965   | 1.000   | 1.000   |
| Checkerboard score (fungus)  | ALL  | 0.641    | < 0.001 | < 0.001 | < 0.001 |
|                              | MRZ  | 0.484    | < 0.001 | < 0.001 | < 0.001 |
|                              | EcM  | 0.405    | 0.024   | < 0.001 | 0.195   |
|                              | AM   | 0.606    | 0.022   | 0.004   | 0.006   |
|                              | ASC  | 0.657    | < 0.001 | < 0.001 | < 0.001 |
|                              | BSD  | 0.529    | 0.002   | < 0.001 | 0.012   |
| Checkerboard score (plant)   | ALL  | 0.583    | 0.986   | 0.056   | 0.037   |
|                              | MRZ  | 0.536    | 0.998   | 0.743   | 0.535   |
|                              | EcM  | 0.521    | 1.000   | 0.971   | 0.505   |
|                              | AM   | 0.491    | 0.326   | 0.121   | 0.079   |
|                              | ASC  | 0.544    | 0.738   | 0.003   | < 0.001 |
|                              | BSD  | 0.579    | 0.999   | 0.898   | 0.562   |
| Interaction evenness         | ALL  | 0.637    | 1.000   | 1.000   | 1.000   |
|                              | MRZ  | 0.622    | 1.000   | 1.000   | 1.000   |
|                              | EcM  | 0.611    | 1.000   | 1.000   | 1.000   |

|                     |     |       |         |         |         |
|---------------------|-----|-------|---------|---------|---------|
|                     | AM  | 0.665 | 0.717   | 0.959   | 0.874   |
|                     | ASC | 0.605 | 1.000   | 1.000   | 1.000   |
|                     | BSD | 0.621 | 1.000   | 1.000   | 1.000   |
| Modularity (Barber) | ALL | 0.406 | < 0.001 | < 0.001 | < 0.001 |
|                     | MRZ | 0.375 | 0.009   | < 0.001 | < 0.001 |
|                     | EcM | 0.364 | 0.365   | < 0.001 | < 0.001 |
|                     | AM  | 0.389 | 0.620   | 0.070   | 0.087   |
|                     | ASC | 0.404 | 0.002   | < 0.001 | < 0.001 |
|                     | BSD | 0.398 | 0.340   | < 0.001 | < 0.001 |
| Nestedness (NODF)   | ALL | 29.1  | 1.000   | 1.000   | 1.000   |
|                     | MRZ | 42.6  | 0.994   | 1.000   | 1.000   |
|                     | EcM | 48.6  | 0.897   | 1.000   | 0.950   |
|                     | AM  | 40.4  | 0.792   | 0.964   | 0.972   |
|                     | ASC | 28.6  | 1.000   | 1.000   | 1.000   |
|                     | BSD | 38.5  | 0.988   | 1.000   | 0.996   |

**Supplementary Table 1 | Randomization tests based on three different null models.** For each network index, randomization tests with three null models were conducted. A small *P* value indicates that the network index of the original matrix is larger than that of randomized matrices (1,000 permutations). ALL, the entire network involving all plant species and fungal OTUs; MRZ, mycorrhizal sub-network; EcM, ectomycorrhizal sub-network; AM, arbuscular mycorrhizal sub-network; ASC, ascomycete sub-network; BSD, basidiomycete sub-network.

| Interaction  | Dataset code name | Data type          | Location                                                                                                                                       | N   | Ref. | Data        |
|--------------|-------------------|--------------------|------------------------------------------------------------------------------------------------------------------------------------------------|-----|------|-------------|
|              |                   |                    |                                                                                                                                                |     |      | repository* |
| Anemone–fish | anemonefish       | binary             | East coast of Africa and the Red Sea through the Indian Ocean to the western Pacific, and from southeastern Australia to the latitude of Tokyo | 36  | 1    | A           |
|              | Rich_Bahowo       | binary             | Manado region of Sulawesi, Indonesia                                                                                                           | 11  | 2    | A           |
|              | Rich_Kopi         | binary             | Manado region of Sulawesi, Indonesia                                                                                                           | 10  |      | A           |
| Food web     | AkatoreA          | binary             | Otago, New Zealand                                                                                                                             | 84  | 3-9  | A           |
|              | AkatoreB          | binary             | Otago, New Zealand                                                                                                                             | 54  |      | A           |
|              | Berwick           | binary             | Otago, New Zealand                                                                                                                             | 77  |      | A           |
|              | Blackrock         | binary             | Otago, New Zealand                                                                                                                             | 86  |      | A           |
|              | Broad             | binary             | Otago, New Zealand                                                                                                                             | 94  |      | A           |
|              | Canton            | binary             | Otago, New Zealand                                                                                                                             | 108 |      | A           |
|              | carpinteria       | binary             | Salt marsh                                                                                                                                     | 128 | 10   | A           |
|              | Catlins           | binary             | Otago, New Zealand                                                                                                                             | 48  | 3-9  | A           |
|              | Coweeta1          | binary             | North Carolina, USA                                                                                                                            | 58  |      | A           |
|              | Coweeta17         | binary             | North Carolina, USA                                                                                                                            | 71  |      | A           |
|              | DempstersAu       | binary             | Otago, New Zealand                                                                                                                             | 83  |      | A           |
|              | DempstersSp       | binary             | Otago, New Zealand                                                                                                                             | 93  |      | A           |
|              | DempstersSu       | binary             | Otago, New Zealand                                                                                                                             | 107 |      | A           |
| German       | binary            | Otago, New Zealand | 84                                                                                                                                             |     | A    |             |

---

|               |                      |        |                             |     |       |   |
|---------------|----------------------|--------|-----------------------------|-----|-------|---|
|               | Healy                | binary | Otago, New Zealand          | 96  |       | A |
|               | Kyeburn              | binary | Otago, New Zealand          | 98  |       | A |
|               | LilKyeburn           | binary | Otago, New Zealand          | 78  |       | A |
|               | Martins              | binary | Maine, USA                  | 105 |       | A |
|               | Narrowdale           | binary | Otago, New Zealand          | 71  |       | A |
|               | NorthCol             | binary | Otago, New Zealand          | 78  |       | A |
|               | Powder               | binary | Otago, New Zealand          | 78  |       | A |
|               | Stony                | binary | Otago, New Zealand          | 112 |       | A |
|               | SuttonAu             | binary | Otago, New Zealand          | 80  |       | A |
|               | SuttonSp             | binary | Otago, New Zealand          | 74  |       | A |
|               | SuttonSu             | binary | Otago, New Zealand          | 86  |       | A |
|               | Troy                 | binary | Maine, USA                  | 77  |       | A |
|               | Venlaw               | binary | Otago, New Zealand          | 66  |       | A |
| Host-parasite | aishihik             | binary | Yukon Territory, Canada     | 36  | 11-16 | A |
|               | cold                 | binary | Alberta, Canada             | 50  |       | A |
|               | mcgregor             | binary | British Columbia,<br>Canada | 65  |       | A |
|               | parsnip              | binary | British Columbia,<br>Canada | 70  |       | A |
|               | sbay_huron           | binary | Labrador, Canada            | 130 |       | A |
|               | smallwood            | binary | Ontario, Canada             | 31  |       | A |
|               | woods                | binary | Ontario, Canada             | 175 |       | A |
| Plant-ant     | bluthgen_et_al_2004  | binary | Australia                   | 92  | 17,18 | A |
|               | davidson_et_al_1989  | binary | Peru                        | 24  | 19    | A |
|               | davidson&fisher_1991 | binary | Peru                        | 10  | 20    | A |
|               | fonseca&ganade       | binary | Brazil                      | 41  | 21    | A |

---



---

|                  |                      |              |                                      |     |        |                  |
|------------------|----------------------|--------------|--------------------------------------|-----|--------|------------------|
| Plant–fungus     | ALL                  | quantitative | Kyoto, Japan                         | 420 | 22     | B                |
|                  | AM                   | quantitative | Kyoto, Japan                         | 23  |        | B                |
|                  | ASC                  | quantitative | Kyoto, Japan                         | 217 |        | B                |
|                  | BSD                  | quantitative | Kyoto, Japan                         | 157 |        | B                |
|                  | EcM                  | quantitative | Kyoto, Japan                         | 113 |        | B                |
|                  | MRZ                  | quantitative | Kyoto, Japan                         | 123 |        | B                |
|                  | D.AM                 | binary       | Koeru, Estonia                       | 51  | 23     | <sup>14</sup>    |
|                  | M.AM                 | quantitative | Puebla, Mexico                       | 60  | 24, 25 | <sup>15,54</sup> |
| Plant–herbivore  | joern_1979_altuda    | binary       | Altuda, Trans-Pecos,<br>Texas, USA   | 74  | 26     | A                |
|                  | joern_1979_marathon  | binary       | Marathon, Trans-Pecos,<br>Texas, USA | 78  |        | A                |
|                  | leather_1991_britain | binary       | Britain                              | 94  | 27     | A                |
|                  | leather_1991inland   | binary       | Finland                              | 69  |        | A                |
| Plant–pollinator | DIHI                 | quantitative | Hickling, Norfolk, UK                | 78  | 28     | C                |
|                  | DISH                 | quantitative | Shelfanger, Norfolk, UK              | 52  |        | C                |
|                  | EOLZ                 | binary       | Zackenbergl                          | 107 | 29     | C                |
|                  | ESKI                 | binary       | Mauritius Island                     | 27  | 30     | C                |
|                  | HERR                 | binary       | Doñana Nat. Park, Spain              | 205 | 31     | C                |
|                  | OFLO                 | binary       | Flores, Açores                       | 22  | 32     | C                |
|                  | OFST                 | binary       | Hestehaven, Denmark                  | 50  |        | C                |
|                  | OLAU                 | binary       | Garajonay, Gomera,<br>Spain          | 84  |        | C                |
|                  | PERC                 | binary       | Jamaica                              | 97  | 33     | C                |
|                  | PRAP                 | binary       | Arthur's Pass, New<br>Zealand        | 78  | 34     | C                |

---

---

|                         |              |                                     |     |       |   |
|-------------------------|--------------|-------------------------------------|-----|-------|---|
| PRCA                    | binary       | Cass, New Zealand                   | 180 |       | C |
| PRCG                    | binary       | Craigieburn, New Zealand            | 167 |       | C |
| PTND                    | binary       | Daphní, Athens, Greece              | 797 | 35    | C |
| RMRZ                    | binary       | Canaima Nat. Park, Venezuela        | 97  | 36    | C |
| SMRA                    | binary       | Chiloe, Chile                       | 154 | 37    | C |
| arr_1                   | binary       | Chile                               | 186 | 38    | A |
| arr_2                   | binary       | Chile                               | 103 |       | A |
| arr_3                   | binary       | Chile                               | 69  |       | A |
| barrett                 | quantitative | Canada                              | 114 | 39    | A |
| Bartomeus_Ntw_nceas     | quantitative | Catalonia, Spain                    | 151 | 40    | A |
| bezerra-et-al-2009      | quantitative | Pernambuco State, Brazil            | 26  | 41    | A |
| cle                     | binary       | USA                                 | 371 | 42    | A |
| dupont                  | binary       | Tenerife, Canary Islands            | 49  | 43    | A |
| elb                     | quantitative | Sweden                              | 141 | 44    | A |
| hocking                 | binary       | Canada                              | 115 | 45    | A |
| ino                     | quantitative | Australia                           | 133 | 46    | A |
| kaiser-bunbury_control  | binary       | Mauritius                           | 158 | 47,48 | A |
| kaiser-bunbury_restored | binary       | Mauritius                           | 208 |       | A |
| kato                    | quantitative | Japan                               | 767 | 49    | A |
| mc_mullen               | binary       | Galápagos Islands                   | 159 | 50    | A |
| medan_ld                | binary       | Laguna Diamante, Mendoza, Argentina | 66  | 51    | A |
| medan_rb                | binary       | Río Blanco, Mendoza, Argentina      | 95  |       | A |

---

---

|                         |                   |              |                                       |      |       |   |
|-------------------------|-------------------|--------------|---------------------------------------|------|-------|---|
|                         | mem               | quantitative | Bristol, U.K.                         | 104  | 52    | A |
|                         | mos               | quantitative | Canada                                | 29   | 53    | A |
|                         | mot               | quantitative | USA                                   | 57   | 54    | A |
|                         | ole_aigr          | quantitative | Mauritius Island                      | 27   | 55    | A |
|                         | olelores          | quantitative | Azores Islands                        | 22   |       | A |
|                         | ollerton          | quantitative | KwaZulu-Natal region,<br>South Africa | 65   | 56    | A |
|                         | ram               | binary       | Venezuela                             | 81   | 57    | A |
|                         | robertson_1929    | binary       | USA                                   | 1500 | 58    | A |
|                         | santos-et-al-2010 | binary       | Bahia State, Brazil                   | 76   | 59    | A |
|                         | schemske          | quantitative | USA                                   | 39   | 60    | A |
|                         | small             | quantitative | Canada                                | 47   | 61    | A |
|                         | vaz_ag            | quantitative | Argentina                             | 39   | 62-64 | A |
|                         | vaz_cl            | quantitative | Argentina                             | 42   |       | A |
|                         | vaz_ll            | quantitative | Argentina                             | 39   |       | A |
|                         | vaz_mh            | quantitative | Argentina                             | 34   |       | A |
|                         | vaz_mnh           | quantitative | Argentina                             | 43   |       | A |
|                         | vaz_qh            | quantitative | Argentina                             | 35   |       | A |
|                         | vaz_qnh           | quantitative | Argentina                             | 31   |       | A |
|                         | vaz_s             | quantitative | Argentina                             | 36   |       | A |
| Plant–seed<br>disperser | CACG              | quantitative | Caguana, Puerto Rico                  | 41   | 65    | C |
|                         | CACI              | quantitative | Cialitos, Puerto Rico                 | 54   |       | C |
|                         | CACO              | quantitative | Cordillera, Puerto Rico               | 38   |       | C |
|                         | CAFR              | quantitative | Fronton, Puerto Rico                  | 36   |       | C |
|                         | CROM              | binary       | Tropical rainforest.                  | 79   | 66    | C |

---

---

| Queensland, Australia. |              |                                                                                   |     |    |   |
|------------------------|--------------|-----------------------------------------------------------------------------------|-----|----|---|
| FROS                   | binary       | Mtunzini, South Africa                                                            | 26  | 67 | C |
| GEN1                   | quantitative | Santa Genebra Reserve<br>T1. SE Brazil                                            | 25  | 68 | C |
| GEN2                   | quantitative | Santa Genebra Reserve<br>T2. SE Brazil                                            | 64  |    | C |
| HAMM                   | binary       | North Negros Forest Reserve,<br>Central Philippine Islands                        | 55  | 69 | C |
| HRAT                   | binary       | Hato Ratón, Sevilla.<br>Spain                                                     | 33  | 70 | C |
| KANT                   | binary       | Campeche state, Mexico                                                            | 32  | 71 | C |
| LAMB                   | binary       | Kuala Lompat, Krau Game Reserve.                                                  | 86  | 72 | C |
| LOPE                   | binary       | Gabon, Africa                                                                     | 27  | 73 | C |
| MACK                   | binary       | Crater Mountain Biological Research Station,<br>Chimbu Province, Papua New Guinea | 61  | 74 | C |
| MONT                   | binary       | Monteverde, Costa Rica                                                            | 209 | 75 | C |
| NCOR                   | binary       | Nava Correhuelas. S. Cazorla, SE Spain.                                           | 58  | 76 | C |
| NNOG                   | binary       | Nava Noguera, Sierra de Cazorla, SE Spain                                         | 46  |    | C |
| SAPF                   | binary       | Yakushima Island,<br>Japan                                                        | 23  | 77 | C |
| WES                    | binary       | Intervalles and Saibadela, São Paulo, Brazil                                      | 317 | 78 | C |

---

---

|                       |              |                                                |     |    |   |
|-----------------------|--------------|------------------------------------------------|-----|----|---|
| beehler_1983          | quantitative | Papa New Guinea                                | 40  | 79 | A |
| poulin_1999           | quantitative | Central Panama                                 | 24  | 80 | A |
| schleuning-et-al-2010 | quantitative | Kakamega Forest,<br>Western Province,<br>Kenya | 121 | 81 | A |
| snow&snow_1971        | quantitative | Trinidad                                       | 79  | 82 | A |
| snow&snow_1988        | quantitative | No information                                 | 48  | 83 | A |
| sorensen_1981         | quantitative | Britain                                        | 25  | 84 | A |

---

**Supplementary Table 2 | List of the datasets for the comparison of network architecture among different forms of interactions.** The forms of interactions, dataset name, data type (binary or quantitative), sampling location, the number of species involved ( $N$ ), source reference, and data repository are shown for each dataset.

\*Data repository: A, Interaction Web DataBase<sup>85</sup> (<http://www.nceas.ucsb.edu/interactionweb/index.html>); B, Rezende et al. (2007) Nature<sup>86</sup>; C, Toju et al. (2013) Ecology and Evolution<sup>22</sup>.

| PC axis | Factor loading |                |            |            | Proportion  | Cumulative |
|---------|----------------|----------------|------------|------------|-------------|------------|
|         | Connectance    | Specialization | Nestedness | Modularity | of variance | proportion |
| PC1     | 0.365          | -0.492         | 0.546      | -0.571     | 0.68        | 0.68       |
| PC2     | -0.821         | -0.554         | 0.118      | 0.066      | 0.23        | 0.91       |
| PC3     | 0.038          | -0.289         | -0.813     | -0.503     | 0.07        | 0.97       |
| PC4     | 0.437          | -0.606         | -0.163     | 0.645      | 0.03        | 1.00       |

**Supplementary Table 3 | Axes in the principal component analysis.** The factor loading and the proportion of explained variance are shown for each principal component (PC) axis. See Figure 2 for the result of the principal component analysis.

| PC axis | Factor loading    |             |                |            |            | Proportion  | Cumulative |
|---------|-------------------|-------------|----------------|------------|------------|-------------|------------|
|         | Total interaction | Connectance | Specialization | Nestedness | Modularity | of variance | proportion |
| PC1     | 0.348             | 0.363       | -0.446         | 0.515      | -0.532     | 0.60        | 0.60       |
| PC2     | -0.445            | -0.651      | -0.585         | 0.177      | -0.073     | 0.20        | 0.79       |
| PC3     | -0.816            | 0.500       | 0.098          | 0.000      | -0.273     | 0.13        | 0.93       |
| PC4     | -0.125            | -0.005      | 0.290          | 0.824      | 0.469      | 0.05        | 0.98       |
| PC5     | 0.018             | -0.441      | 0.604          | 0.155      | -0.645     | 0.02        | 1.00       |

**Supplementary Table 4 | Axes in the principal component analysis incorporating the total number of observed interactions.** The factor loading and the proportion of explained variance are shown for each principal component (PC) axis. See Supplementary Figure 4 for the result of the principal component analysis.

| Index                               | Rarefaction trial | P value               |      |      |      |      |      |      |      |      |
|-------------------------------------|-------------------|-----------------------|------|------|------|------|------|------|------|------|
|                                     |                   | Sub-sampling size (%) |      |      |      |      |      |      |      |      |
|                                     |                   | 10                    | 20   | 30   | 40   | 50   | 60   | 70   | 80   | 90   |
| Specialization<br>(H <sup>2</sup> ) | 1                 | 0.92                  | 0.56 | 0.00 | 0.01 | 0.00 | 0.00 | 0.00 | 0.00 | 0.00 |
|                                     | 2                 | 0.87                  | 0.74 | 0.21 | 0.00 | 0.00 | 0.00 | 0.00 | 0.00 | 0.00 |
|                                     | 3                 | 0.78                  | 0.59 | 0.56 | 0.01 | 0.00 | 0.00 | 0.00 | 0.00 | 0.00 |
|                                     | 4                 | 0.90                  | 0.52 | 0.12 | 0.03 | 0.00 | 0.00 | 0.00 | 0.00 | 0.00 |
|                                     | 5                 | 0.60                  | 0.95 | 0.04 | 0.00 | 0.00 | 0.00 | 0.00 | 0.00 | 0.00 |
|                                     | 6                 | 0.77                  | 0.08 | 0.51 | 0.02 | 0.00 | 0.00 | 0.00 | 0.00 | 0.00 |
|                                     | 7                 | 0.60                  | 0.83 | 0.05 | 0.01 | 0.00 | 0.00 | 0.00 | 0.00 | 0.00 |
|                                     | 8                 | 0.79                  | 0.41 | 0.06 | 0.00 | 0.02 | 0.00 | 0.00 | 0.00 | 0.00 |
|                                     | 9                 | 0.96                  | 0.12 | 0.05 | 0.00 | 0.00 | 0.00 | 0.00 | 0.00 | 0.00 |
|                                     | 10                | 0.93                  | 0.27 | 0.01 | 0.04 | 0.00 | 0.00 | 0.00 | 0.00 | 0.00 |
|                                     | 11                | 0.59                  | 0.74 | 0.06 | 0.00 | 0.00 | 0.00 | 0.00 | 0.00 | 0.00 |
|                                     | 12                | 0.88                  | 0.59 | 0.14 | 0.00 | 0.00 | 0.00 | 0.00 | 0.00 | 0.00 |
|                                     | 13                | 0.87                  | 0.61 | 0.06 | 0.00 | 0.00 | 0.00 | 0.00 | 0.00 | 0.00 |
|                                     | 14                | 0.42                  | 0.11 | 0.00 | 0.01 | 0.00 | 0.00 | 0.00 | 0.00 | 0.00 |
|                                     | 15                | 0.90                  | 0.24 | 0.00 | 0.00 | 0.00 | 0.00 | 0.00 | 0.00 | 0.00 |
|                                     | 16                | 0.93                  | 0.76 | 0.01 | 0.00 | 0.00 | 0.00 | 0.00 | 0.00 | 0.00 |
|                                     | 17                | 0.93                  | 0.18 | 0.02 | 0.00 | 0.00 | 0.00 | 0.00 | 0.00 | 0.00 |
|                                     | 18                | 0.95                  | 0.24 | 0.28 | 0.00 | 0.00 | 0.00 | 0.00 | 0.00 | 0.00 |
|                                     | 19                | 0.57                  | 0.28 | 0.03 | 0.04 | 0.00 | 0.00 | 0.00 | 0.00 | 0.00 |
|                                     | 20                | 0.63                  | 0.69 | 0.00 | 0.03 | 0.00 | 0.00 | 0.00 | 0.00 | 0.00 |
| Modularity<br>(Barber)              | 1                 | 0.00                  | 0.00 | 0.01 | 0.00 | 0.00 | 0.00 | 0.02 | 0.00 | 0.00 |
|                                     | 2                 | 0.12                  | 0.00 | 0.01 | 0.10 | 0.00 | 0.00 | 0.00 | 0.00 | 0.00 |
|                                     | 3                 | 0.05                  | 0.04 | 0.00 | 0.00 | 0.00 | 0.00 | 0.00 | 0.00 | 0.00 |
|                                     | 4                 | 0.07                  | 0.00 | 0.00 | 0.00 | 0.00 | 0.00 | 0.00 | 0.00 | 0.00 |
|                                     | 5                 | 0.02                  | 0.39 | 0.00 | 0.02 | 0.00 | 0.00 | 0.00 | 0.00 | 0.00 |
|                                     | 6                 | 0.00                  | 0.09 | 0.01 | 0.00 | 0.00 | 0.00 | 0.00 | 0.00 | 0.00 |
|                                     | 7                 | 0.16                  | 0.00 | 0.00 | 0.00 | 0.00 | 0.00 | 0.00 | 0.00 | 0.00 |
|                                     | 8                 | 0.38                  | 0.08 | 0.00 | 0.03 | 0.00 | 0.00 | 0.00 | 0.00 | 0.00 |
|                                     | 9                 | 0.11                  | 0.08 | 0.00 | 0.00 | 0.00 | 0.00 | 0.00 | 0.00 | 0.00 |
|                                     | 10                | 0.10                  | 0.00 | 0.04 | 0.00 | 0.00 | 0.00 | 0.00 | 0.00 | 0.00 |
|                                     | 11                | 0.20                  | 0.00 | 0.15 | 0.04 | 0.00 | 0.00 | 0.04 | 0.00 | 0.00 |
|                                     | 12                | 0.14                  | 0.09 | 0.00 | 0.00 | 0.00 | 0.00 | 0.00 | 0.00 | 0.00 |
|                                     | 13                | 0.07                  | 0.06 | 0.00 | 0.02 | 0.00 | 0.00 | 0.00 | 0.00 | 0.00 |



|                                  |    |      |      |      |      |      |      |      |      |      |
|----------------------------------|----|------|------|------|------|------|------|------|------|------|
|                                  | 14 | 0.12 | 0.00 | 0.03 | 0.00 | 0.00 | 0.00 | 0.00 | 0.00 | 0.00 |
|                                  | 15 | 0.03 | 0.05 | 0.00 | 0.00 | 0.00 | 0.00 | 0.00 | 0.00 | 0.00 |
|                                  | 16 | 0.00 | 0.01 | 0.02 | 0.00 | 0.00 | 0.00 | 0.00 | 0.02 | 0.00 |
|                                  | 17 | 0.83 | 0.00 | 0.01 | 0.00 | 0.00 | 0.00 | 0.00 | 0.00 | 0.00 |
|                                  | 18 | 0.11 | 0.11 | 0.00 | 0.00 | 0.04 | 0.00 | 0.00 | 0.00 | 0.00 |
|                                  | 19 | 0.14 | 0.12 | 0.08 | 0.00 | 0.00 | 0.00 | 0.00 | 0.00 | 0.00 |
|                                  | 20 | 0.01 | 0.01 | 0.00 | 0.00 | 0.00 | 0.00 | 0.00 | 0.00 | 0.00 |
| Nestedness<br>(weighted<br>NODF) | 1  | 0.76 | 0.96 | 1.00 | 1.00 | 1.00 | 1.00 | 1.00 | 1.00 | 1.00 |
|                                  | 2  | 0.60 | 0.94 | 1.00 | 0.99 | 1.00 | 1.00 | 1.00 | 1.00 | 1.00 |
|                                  | 3  | 0.82 | 0.90 | 1.00 | 1.00 | 1.00 | 1.00 | 1.00 | 1.00 | 1.00 |
|                                  | 4  | 0.88 | 0.98 | 0.99 | 0.96 | 0.99 | 1.00 | 1.00 | 1.00 | 1.00 |
|                                  | 5  | 0.85 | 0.86 | 0.97 | 1.00 | 0.99 | 1.00 | 1.00 | 1.00 | 1.00 |
|                                  | 6  | 0.68 | 0.93 | 0.99 | 1.00 | 1.00 | 1.00 | 1.00 | 1.00 | 1.00 |
|                                  | 7  | 0.68 | 0.90 | 0.94 | 1.00 | 1.00 | 1.00 | 1.00 | 1.00 | 1.00 |
|                                  | 8  | 0.32 | 0.95 | 0.99 | 1.00 | 1.00 | 1.00 | 1.00 | 1.00 | 1.00 |
|                                  | 9  | 0.65 | 0.79 | 0.99 | 1.00 | 1.00 | 1.00 | 1.00 | 1.00 | 1.00 |
|                                  | 10 | 0.74 | 0.97 | 0.94 | 1.00 | 1.00 | 0.98 | 1.00 | 1.00 | 1.00 |
|                                  | 11 | 0.72 | 0.75 | 0.98 | 0.99 | 1.00 | 1.00 | 1.00 | 1.00 | 1.00 |
|                                  | 12 | 0.41 | 0.77 | 1.00 | 1.00 | 0.93 | 1.00 | 1.00 | 1.00 | 1.00 |
|                                  | 13 | 0.59 | 0.93 | 1.00 | 1.00 | 1.00 | 1.00 | 1.00 | 1.00 | 1.00 |
|                                  | 14 | 0.75 | 0.97 | 1.00 | 1.00 | 1.00 | 1.00 | 1.00 | 1.00 | 1.00 |
|                                  | 15 | 0.38 | 1.00 | 0.99 | 1.00 | 1.00 | 1.00 | 1.00 | 1.00 | 1.00 |
|                                  | 16 | 0.65 | 0.61 | 0.99 | 1.00 | 1.00 | 1.00 | 1.00 | 1.00 | 1.00 |
|                                  | 17 | 0.41 | 0.91 | 0.98 | 0.99 | 1.00 | 1.00 | 1.00 | 1.00 | 1.00 |
|                                  | 18 | 0.87 | 0.85 | 0.89 | 1.00 | 1.00 | 1.00 | 1.00 | 1.00 | 1.00 |
|                                  | 19 | 0.74 | 0.95 | 0.97 | 1.00 | 0.98 | 1.00 | 1.00 | 1.00 | 1.00 |
|                                  | 20 | 0.69 | 0.76 | 1.00 | 1.00 | 1.00 | 1.00 | 1.00 | 1.00 | 1.00 |

**Supplementary Table 5 | Randomization tests for the sub-sampled data.** For 20 of the 100 rarefaction trials at each level of reduced sample size (Supplementary Fig. 7), a randomization test of each network index was performed. A small  $P$  value indicates that the network index of the original matrix is larger than that of randomized matrices (Model 1; 100 permutations).

## Supplementary References

- 1 Ollerton, J., McCollin, D., Fautin, D. G. & Allen, G. R. Finding NEMO: nestedness engendered by mutualistic organization in anemonefish and their hosts. *Proc. R. Soc. Lond. Ser. B* **274**, 591-598 (2007).
- 2 Ricciardi, F., Boyer, M. & Ollerton, J. Assemblage and interaction structure of the anemonefish-anemone mutualism across the Manado region of Sulawesi, Indonesia. *Env. Biol. Fishes* **87**, 333-347 (2010).
- 3 Jaarsma, N., De Boer, S., Townsend, C., Thompson, R. & Edwards, E. Characterising food-webs in two New Zealand streams. *New Zealand J. Marine Freshwater Res.* **32**, 271-286 (1998).
- 4 Thompson, R., Edwards, E., McIntosh, A. & Townsend, C. Allocation of effort in stream food-web studies: the best compromise? *Marine Freshwater Res.* **52**, 339-345 (2001).
- 5 Thompson, R. M. & Townsend, C. R. The effect of seasonal variation on the community structure and food-web attributes of two streams: implications for food-web science. *Oikos* **87**, 75-88 (1999).
- 6 Thompson, R. M. & Townsend, C. R. Is resolution the solution?: the effect of taxonomic resolution on the calculated properties of three stream food webs. *Freshwater Bio.* **44**, 413-422 (2000).
- 7 Thompson, R. & Townsend, C. Impacts on stream food webs of native and exotic forest: an intercontinental comparison. *Ecology* **84**, 145-161 (2003).
- 8 Thompson, R. & Townsend, C. Energy availability, spatial heterogeneity and ecosystem size predict food-web structure in streams. *Oikos* **108**, 137-148 (2005).
- 9 Townsend, C. Disturbance, resource supply, and food-web architecture in streams. *Ecol. Lett.* **1**, 200-209 (1998).
- 10 Lafferty, K. D., Dobson, A. P. & Kuris, A. M. Parasites dominate food web links. *Proc. Natl. Acad. Sci. U.S.A.* **103**, 11211-11216 (2006).
- 11 Arai, H. P. & Mudry, D. R. Protozoan and metazoan parasites of fishes from the headwaters of the Parsnip and McGregor Rivers, British Columbia: a study of possible parasite transfaunations. *Can. J. Fish. Aqua. Sci.* **40**, 1676-1684 (1983).

- 12 Arthur, J., Margolis, L. & Arai, H. Parasites of fishes of Aishihik and Stevens Lakes, Yukon Territory, and potential consequences of their interlake transfer through a proposed water diversion for hydroelectrical purposes. *J. Fish. Board Canada* **33**, 2489-2499 (1976).
- 13 Bangham, R. V. Studies on fish parasites of Lake Huron and Manitoulin Island. *Amer. Midland Natur.* **53**, 184-194 (1955).
- 14 Chinniah, V. & Threlfall, W. Metazoan parasites of fish from the Smallwood Reservoir, Labrador, Canada. *J. Fish Biol.* **13**, 203-213 (1978).
- 15 Dechtiar, A. O. Parasites of fish from Lake of the Woods, Ontario. *J. Fisheries Board Canada* **29**, 275-283 (1972).
- 16 Leong, T. & Holmest, J. Communities of metazoan parasites in open water fishes of Cold Lake, Alberta. *J. Fish Biol.* **18**, 693-713 (1981).
- 17 Blüthgen, N., E Stork, N. & Fiedler, K. Bottom-up control and co-occurrence in complex communities: honeydew and nectar determine a rainforest ant mosaic. *Oikos* **106**, 344-358 (2004).
- 18 Blüthgen, N. & Fiedler, K. Preferences for sugars and amino acids and their conditionality in a diverse nectar-feeding ant community. *J. Anim. Ecol.* **73**, 155-166 (2004).
- 19 Davidson, D. W., Snelling, R. R. & Longino, J. T. Competition among ants for myrmecophytes and the significance of plant trichomes. *Biotropica* **21**, 64-73 (1989).
- 20 Davidson, D. in *Ant-plant interactions* (eds C. R. Huxley & D. F. Cutler) 289-309 (Oxford University Press, 1991).
- 21 Fonseca, C. R. & Ganade, G. Asymmetries, compartments and null interactions in an Amazonian ant-plant community. *J. Anim. Ecol.* **65**, 339-347 (1996).
- 22 Toju, H. *et al.* How are plant and fungal communities linked to each other in belowground ecosystems? A massively parallel pyrosequencing analysis of the association specificity of root-associated fungi and their host plants. *Ecol. Evol.* **3**, 3112-3124 (2013).
- 23 Davison, J., Öpik, M., Daniell, T. J., Moora, M. & Zobel, M. Arbuscular mycorrhizal fungal communities in plant roots are not random assemblages. *FEMS Microbial. Ecol.* **78**, 103-115 (2011).
- 24 Montesinos-Navarro, A., Segarra-Moragues, J. G., Valiente-Banuet, A. & Verdú,

- M. The network structure of plant-arbuscular mycorrhizal fungi. *New Phytol.* **194**, 536-547 (2012).
- 25 Montesinos-Navarro, A., Segarra-Moragues, J. G., Valiente-Banuet, A. & Verdú, M. Plant facilitation occurs between species differing in their associated arbuscular mycorrhizal fungi. *New Phytol.* **196**, 835-844 (2012).
- 26 Joern, A. Feeding patterns in grasshoppers (Orthoptera: Acrididae): factors influencing diet specialization. *Oecologia* **38**, 325-347 (1979).
- 27 Leather, S. R. Feeding specialisation and host distribution of British and Finnish *Prunus* feeding macrolepidoptera. *Oikos* **60**, 40-48 (1991).
- 28 Dicks, L., Corbet, S. & Pywell, R. Compartmentalization in plant–insect flower visitor webs. *J. Anim. Ecol.* **71**, 32-43 (2002).
- 29 Elberling, H. & Olesen, J. M. *Unpublished work*.
- 30 Eskildsen, L. I. *Unpublished work*.
- 31 Herrera, J. Pollination relationships in southern Spanish Mediterranean shrublands. *J. Ecol.* **76**, 274-287 (1988).
- 32 Olesen, J. M. *Unpublished work*.
- 33 Percival, M. Floral ecology of coastal scrub in southeast Jamaica. *Biotropica* **6**, 104-129 (1974).
- 34 Primack, R. B. Insect pollination in the New Zealand mountain flora. *New Zealand J. Bot.* **21**, 317-333 (1983).
- 35 Petanidou, T. *Pollination ecology in a phryganic ecosystem* Ph.D. thesis thesis, Aristotelian University, (1991).
- 36 Ramirez, N. Biología de polinización en una comunidad arbustiva tropical de la alta Guayana venezolana. *Biotropica* **21**, 319-330 (1989).
- 37 Smith - Ramírez, C., Martínez, P., Nunez, M., González, C. & Armesto, J. J. Diversity, flower visitation frequency and generalism of pollinators in temperate rain forests of Chiloé Island, Chile. *Bot. J. Linn. Soc.* **147**, 399-416 (2005).
- 38 Arroyo, M. T. K., Primack, R. & Armesto, J. Community studies in pollination ecology in the high temperate Andes of central Chile. I. Pollination mechanisms and altitudinal variation. *Amer. J. Bot.* **69**, 82-97 (1982).
- 39 Barrett, S. C. & Helenurm, K. The reproductive biology of boreal forest herbs. I.

- Breeding systems and pollination. *Can. J. Bot.* **65**, 2036-2046 (1987).
- 40 Bartomeus, I., Vilà, M. & Santamaría, L. Contrasting effects of invasive plants in plant–pollinator networks. *Oecologia* **155**, 761-770 (2008).
- 41 Bezerra, E. L., Machado, I. C. & Mello, M. A. Pollination networks of oil - flowers: a tiny world within the smallest of all worlds. *J. Anim. Ecol.* **78**, 1096-1101 (2009).
- 42 Clements, F. E. & Long, F. L. *Experimental pollination: an outline of the ecology of flowers and insects*. (Carnegie Institution of Washington, 1923).
- 43 Dupont, Y. L., Hansen, D. M. & Olesen, J. M. Structure of a plant-flower-visitor network in the high-altitude sub-alpine desert of Tenerife, Canary Islands. *Ecography* **26**, 301-310 (2003).
- 44 Elberling, H. & Olesen, J. M. The structure of a high latitude plant-flower visitor system: the dominance of flies. *Ecography* **22**, 314-323 (1999).
- 45 Hocking, B. Insect-flower associations in the high Arctic with special reference to nectar. *Oikos* **19**, 359-387 (1968).
- 46 Inouye, D. W. & Pyke, G. H. Pollination biology in the Snowy Mountains of Australia: comparisons with montane Colorado, USA. *Austral. J. Ecol.* **13**, 191-205 (1988).
- 47 Kaiser-Bunbury, C. N., Memmott, J. & Müller, C. B. Community structure of pollination webs of Mauritian heathland habitats. *Persp. Plant Ecol. Evol. Syst.* **11**, 241-254 (2009).
- 48 Kaiser-Bunbury, C. N., Muff, S., Memmott, J., Müller, C. B. & Caflisch, A. The robustness of pollination networks to the loss of species and interactions: a quantitative approach incorporating pollinator behaviour. *Ecol. Lett.* **13**, 442-452 (2010).
- 49 Kato, M., Kakutani, T., Inoue, T. & Itino, T. Insect-flower relationship in the primary beech forest of Ashu, Kyoto: an overview of the flowering phenology and the seasonal pattern of insect visits. *Contr. Biol. Lab. Kyoto Univ.* **27**, 309-376 (1990).
- 50 McMullen, C. Flower-visiting insects of the Galapagos Islands. *Pan-Pacific Entomol.* **69**, 95-106 (1993).
- 51 Medan, D. *et al.* Plant-pollinator relationships at two altitudes in the Andes of Mendoza, Argentina. *Arctic Antarctic Alpine Res.* **34**, 233-241 (2002).
- 52 Memmott, J. The structure of a plant-pollinator food web. *Ecol. Lett.* **2**, 276-280 (1999).

- 53 Mosquin, T. & Martin, J. Observations on the pollination biology of plants on Melville Island, NWT, Canada. *Can. Field Natur.* **81**, 201-205 (1967).
- 54 Motten, A. F. Pollination ecology of the spring wildflower community of a temperate deciduous forest. *Ecol. Monogr.* **56**, 21-42 (1986).
- 55 Olesen, J. M., Eskildsen, L. I. & Venkatasamy, S. Invasion of pollination networks on oceanic islands: importance of invader complexes and endemic super generalists. *Div. Distr.* **8**, 181-192 (2002).
- 56 Ollerton, J., Johnson, S. D., CRANMER, L. & Kellie, S. The pollination ecology of an assemblage of grassland asclepiads in South Africa. *Ann. Bot.* **92**, 807-834 (2003).
- 57 Ramirez, N. & Brito, Y. Pollination biology in a palm swamp community in the Venezuelan Central Plains. *Bot. J. Linn. Soc.* **110**, 277-302 (1992).
- 58 Robertson, C. *Flowers and insects lists of visitors of four hundred and fifty three flowers.* (The Science Press Printing Company, 1928).
- 59 de Mendonça Santos, G. M., Aguiar, C. M. L. & Mello, M. A. Flower-visiting guild associated with the Caatinga flora: trophic interaction networks formed by social bees and social wasps with plants. *Apidologie* **41**, 466-475 (2010).
- 60 Schemske, D. W. *et al.* Flowering ecology of some spring woodland herbs. *Ecology* **59**, 351-366 (1978).
- 61 Small, E. Insect pollinators of the Mer Bleue peat bog of Ottawa. *Can. Field Natur.* **90**, 22 (1976).
- 62 Vázquez, D. P. *Interactions among introduced ungulates, plants, and pollinators: a field study in the temperate forest of the southern Andes* Ph.D. thesis thesis, The University of Tennessee, (2002).
- 63 Vázquez, D. P. & Simberloff, D. Ecological specialization and susceptibility to disturbance: conjectures and refutations. *Amer. Natur.* **159**, 606-623 (2002).
- 64 Vázquez, D. P. & Simberloff, D. Changes in interaction biodiversity induced by an introduced ungulate. *Ecol. Lett.* **6**, 1077-1083 (2003).
- 65 Carlo, T. A., Collazo, J. A. & Groom, M. J. Avian fruit preferences across a Puerto Rican forested landscape: pattern consistency and implications for seed removal. *Oecologia* **134**, 119-131 (2003).
- 66 Crome, F. The ecology of fruit pigeons in tropical northern Queensland. *Wildlife Res.* **2**, 155-185 (1975).

- 67 Frost, P. in *Acta XVII Congressus Internationalis Ornithologici* (ed R. Noring) 1179-1184 (Deutsche Ornithologische Ges, 1980).
- 68 Galetti, M. & Pizo, M. Fruit eating by birds in a forest fragment in southeastern Brazil. *Ararajuba* **4**, 71-79 (1996).
- 69 Hamann, A. & Curio, E. Interactions among frugivores and fleshy fruit trees in a Philippine submontane rainforest. *Cons. Biol.* **13**, 766-773 (1999).
- 70 Jordano, P. El ciclo anual de los passeriformes frugívoros en el matorral mediterráneo del sur de España: importancia de su invernada y variaciones interanuales. *Ardeola* **32**, 69-94 (1985).
- 71 Kantak, G. E. Observations on some fruit-eating birds in Mexico. *The Auk* **96**, 183-186 (1979).
- 72 Lambert, F. Fig-eating by birds in a Malaysian lowland rain forest. *J.Trop. Ecol.* **5**, 401-412 (1989).
- 73 Tutin, C. E., Ham, R. M., White, L. J. & Harrison, M. J. The primate community of the Lopé Reserve, Gabon: diets, responses to fruit scarcity, and effects on biomass. *Amer. J. Prim.* **42**, 1-24 (1997).
- 74 Mack, A. L. & Wright, D. D. Notes on occurrence and feeding of birds at Crater Mountain biological research station, Papua New Guinea. *Emu* **96**, 89-101 (1996).
- 75 Wheelwright, N. T., Haber, W. A., Murray, K. G. & Guindon, C. Tropical fruit-eating birds and their food plants: a survey of a Costa Rican lower montane forest. *Biotropica* **16**, 173-192 (1984).
- 76 Jordano, P. *Unpublished work*.
- 77 Noma, N. Annual fluctuations of sapfruits production and synchronization within and inter species in a warm temperate forest on Yakushima Island. *Tropics* **6**, 441-449 (1997).
- 78 Silva, W., De Marco Jr, P., Hasui, E. & Gomes, V. (CABI Publishing: Wallingford, UK, 2002).
- 79 Beehler, B. Frugivory and polygamy in birds of paradise. *The Auk* **100**, 1-12 (1983).
- 80 Poulin, B., Wright, S. J., Lefebvre, G. & Calderon, O. Interspecific synchrony and asynchrony in the fruiting phenologies of congeneric bird-dispersed plants in Panama. *J. Trop. Ecol.* **15**, 213-227 (1999).

- 81 Schleuning, M. *et al.* Specialization and interaction strength in a tropical plant-frugivore network differ among forest strata. *Ecology* **92**, 26-36 (2011).
- 82 Snow, B. K. & Snow, D. W. The feeding ecology of tanagers and honeycreepers in Trinidad. *The Auk* **88**, 291-322 (1971).
- 83 Snow, B. K. & Snow, D. W. *Birds and Berries*. (Calton, 1988).
- 84 Sorensen, A. E. Interactions between birds and fruit in a temperate woodland. *Oecologia* **50**, 242-249 (1981).
- 85 Guimarães Jr, P. R. *et al.* *Interaction Web DataBase*, available at <http://www.nceas.ucsb.edu/interactionweb/index.html>, (2012).
- 86 Rezende, E. L., Lavabre, J. E., Guimarães Jr, P. R., Jordano, P. & Bascompte, J. Non-random coextinctions in phylogenetically structured mutualistic networks. *Nature* **448**, 925-928 (2007).
